# Supplementary material for: Untreated Opuntia ficus indica for the Efficient Adsorption of Ni(II), Pb(II), Cu(II) and Cd(II) Ions from Water
Source: MDPI journal article supplement (doi:10.3390/molecules28093953), 2023-05-08
Supplement: s1 [file s1]

## Supplementary Materials

# Untreated *Opuntia ficus indica* for the Efficient Adsorption of Ni(II), Pb(II), Cu(II) and Cd(II) Ions from Water

Marcella Barbera <sup>1,\*</sup>, Serena Indelicato <sup>2</sup>, David Bongiorno <sup>2</sup>, Valentina Censi <sup>1</sup>, Filippo Saiano <sup>3</sup> and Daniela Piazzese <sup>1,\*</sup>

<sup>1</sup> Department of Earth and Marine Sciences, University of Palermo, 90123 Palermo, Italy

<sup>2</sup> Department of Biological, Chemical and Pharmaceutical Science and Technology, University of Palermo, 90123 Palermo, Italy

<sup>3</sup> Department of Agricultural Food and Forestry Sciences, University of Palermo, 90128 Palermo, Italy

\* Correspondence: marcella.barbera@unipa.it (M.B.); daniela.piazzese@unipa.it (D.P.)

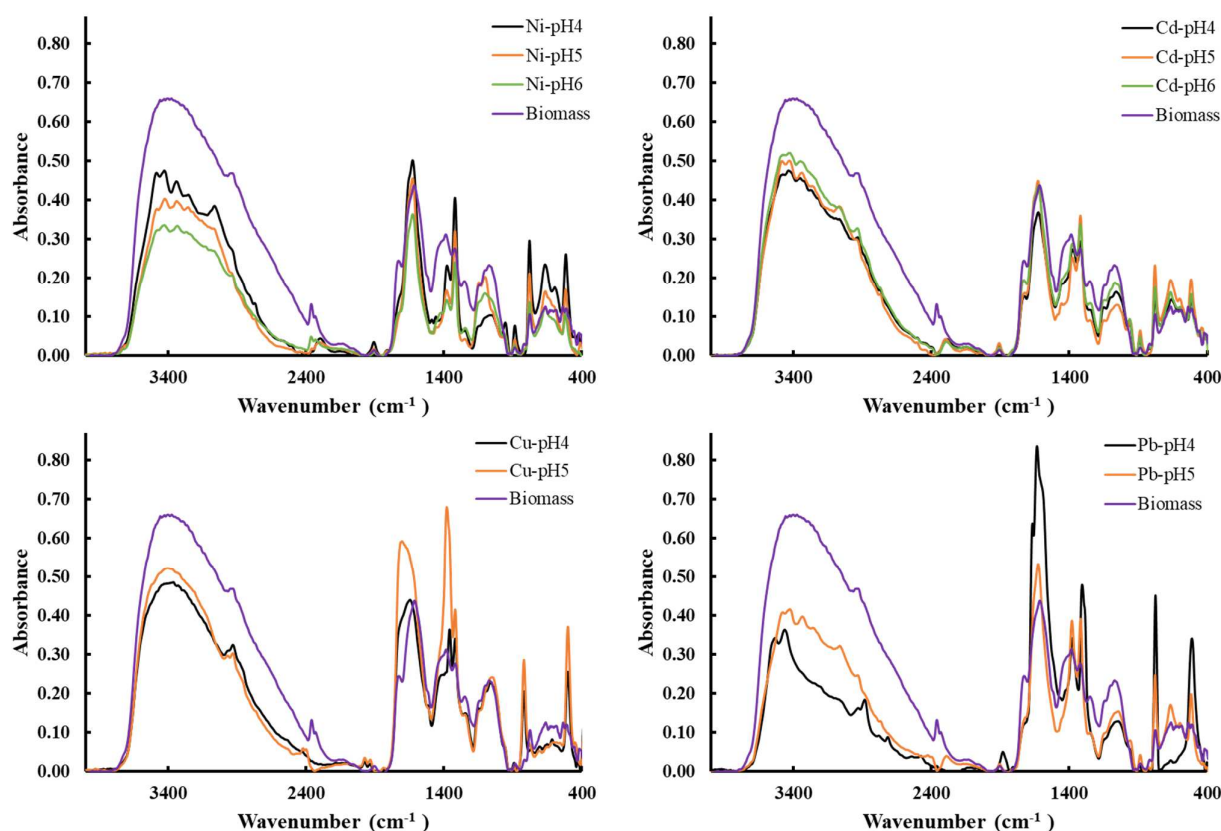

Figure S1. Fig.3 DRIFT spectra of biomass before and after the contact with single at pH 4.0, 5.0 and 6.0.

**Table S1.** Mono-elemental metal ion solution concentrations used for adsorption experiments at pH 4.0, 5.0 and 6.0.

| Pb pH 4 ( $\mu\text{g ml}^{-1}$ ) | Cd pH 4 ( $\mu\text{g ml}^{-1}$ ) | Ni pH 4 ( $\mu\text{g ml}^{-1}$ ) | Cu pH 4 ( $\mu\text{g ml}^{-1}$ ) |
|-----------------------------------|-----------------------------------|-----------------------------------|-----------------------------------|
| 48                                | 27                                | 19                                | 15                                |
| 97                                | 53                                | 38                                | 30                                |
| 192                               | 106                               | 75                                | 61                                |
| 483                               | 265                               | 150                               | 151                               |
| 1045                              | 531                               | 301                               | 303                               |
| 2091                              | 1102                              | 599                               | 631                               |
| 4020                              | 2214                              | 1199                              | 1257                              |
| 8041                              | 3305                              | 2398                              | 2521                              |
| 12062                             | 6642                              | 3686                              | 3785                              |
| 16083                             | 8857                              | 5271                              | 5046                              |
| Pb pH 5 ( $\mu\text{g ml}^{-1}$ ) | Cd pH 5 ( $\mu\text{g ml}^{-1}$ ) | Ni pH 5 ( $\mu\text{g ml}^{-1}$ ) | Cu pH 5 ( $\mu\text{g ml}^{-1}$ ) |
| 50                                | 27                                | 15                                | 27                                |
| 98                                | 54                                | 31                                | 60                                |
| 195                               | 108                               | 62                                | 243                               |
| 505                               | 216                               | 161                               | 273                               |
| 977                               | 432                               | 365                               | 304                               |
| 2118                              | 486                               | 677                               | 425                               |
| 4072                              | 540                               | 1301                              | 547                               |
| 8144                              | 755                               | 2600                              | 605                               |
| 12217                             | 971                               | 3904                              | 1994                              |
| 16289                             | 2151                              | 5207                              | 3055                              |
| Cd pH 6 ( $\mu\text{g ml}^{-1}$ ) |                                   | Ni pH 6 ( $\mu\text{g ml}^{-1}$ ) |                                   |
| 28                                |                                   | 14                                |                                   |
| 54                                |                                   | 28                                |                                   |
| 107                               |                                   | 55                                |                                   |
| 277                               |                                   | 138                               |                                   |
| 536                               |                                   | 276                               |                                   |
| 1161                              |                                   | 598                               |                                   |
| 2171                              |                                   | 1124                              |                                   |
| 4341                              |                                   | 2249                              |                                   |
| 6650                              |                                   | 3445                              |                                   |
| 8880                              |                                   | 4600                              |                                   |

All values correspond to equimolar conditions.

**Table S2.** Multi-elemental metal ion solution concentrations used for adsorption experiments at pH 4.0 and 5.0.

| Ni pH 4 ( $\mu\text{g ml}^{-1}$ ) | Cu pH 4 ( $\mu\text{g ml}^{-1}$ ) | Cd pH 4 ( $\mu\text{g ml}^{-1}$ ) | Pb pH 4( $\mu\text{g ml}^{-1}$ )  |
|-----------------------------------|-----------------------------------|-----------------------------------|-----------------------------------|
| 29                                | 32                                | 56                                | 105                               |
| 59                                | 64                                | 113                               | 213                               |
| 117                               | 129                               | 225                               | 427                               |
| 172                               | 189                               | 330                               | 626                               |
| 289                               | 318                               | 556                               | 1052                              |
| 352                               | 387                               | 676                               | 1280                              |
| Ni pH 5 ( $\mu\text{g ml}^{-1}$ ) | Cu pH 5 ( $\mu\text{g ml}^{-1}$ ) | Cd pH 5 ( $\mu\text{g ml}^{-1}$ ) | Pb pH 5 ( $\mu\text{g ml}^{-1}$ ) |
| 29                                | 32                                | 56                                | 102                               |
| 59                                | 64                                | 113                               | 207                               |
| 117                               | 129                               | 225                               | 413                               |
| 172                               | 189                               | 330                               | 606                               |
| 235                               | 258                               | 451                               | 828                               |
| 289                               | 318                               | 556                               | 1019                              |
| 352                               | 387                               | 676                               | 1240                              |

All values correspond to equimolar conditions.
